# Supplementary material for: A cobalt hydroxide nanosheet-mediated synthesis of core–shell-type Mn0.005Co2.995O4 spinel nanocubes as efficient oxygen electrocatalysts
Source: Royal Society of Chemistry journal article supplement (doi:10.1039/c9dt04009a), 2019-12-28
Supplement: c9dt04009a1.pdf [file c9dt04009a1.pdf]

# Electronic Supplementary Information

## Cobalt Hydroxide Nanosheet-Mediated Synthesis of Core-Shell Type $\text{Mn}_{0.005}\text{Co}_{2.995}\text{O}_4$ Spinel Nanocubes for Efficient Oxygen Electrocatalyst

Sunglun Kwon and Jong Hyeon Lee\*

Department of Chemistry, The Catholic University of Korea, Bucheon, 14662, South Korea

E-mail: [jhlee305@catholic.ac.kr](mailto:jhlee305@catholic.ac.kr)

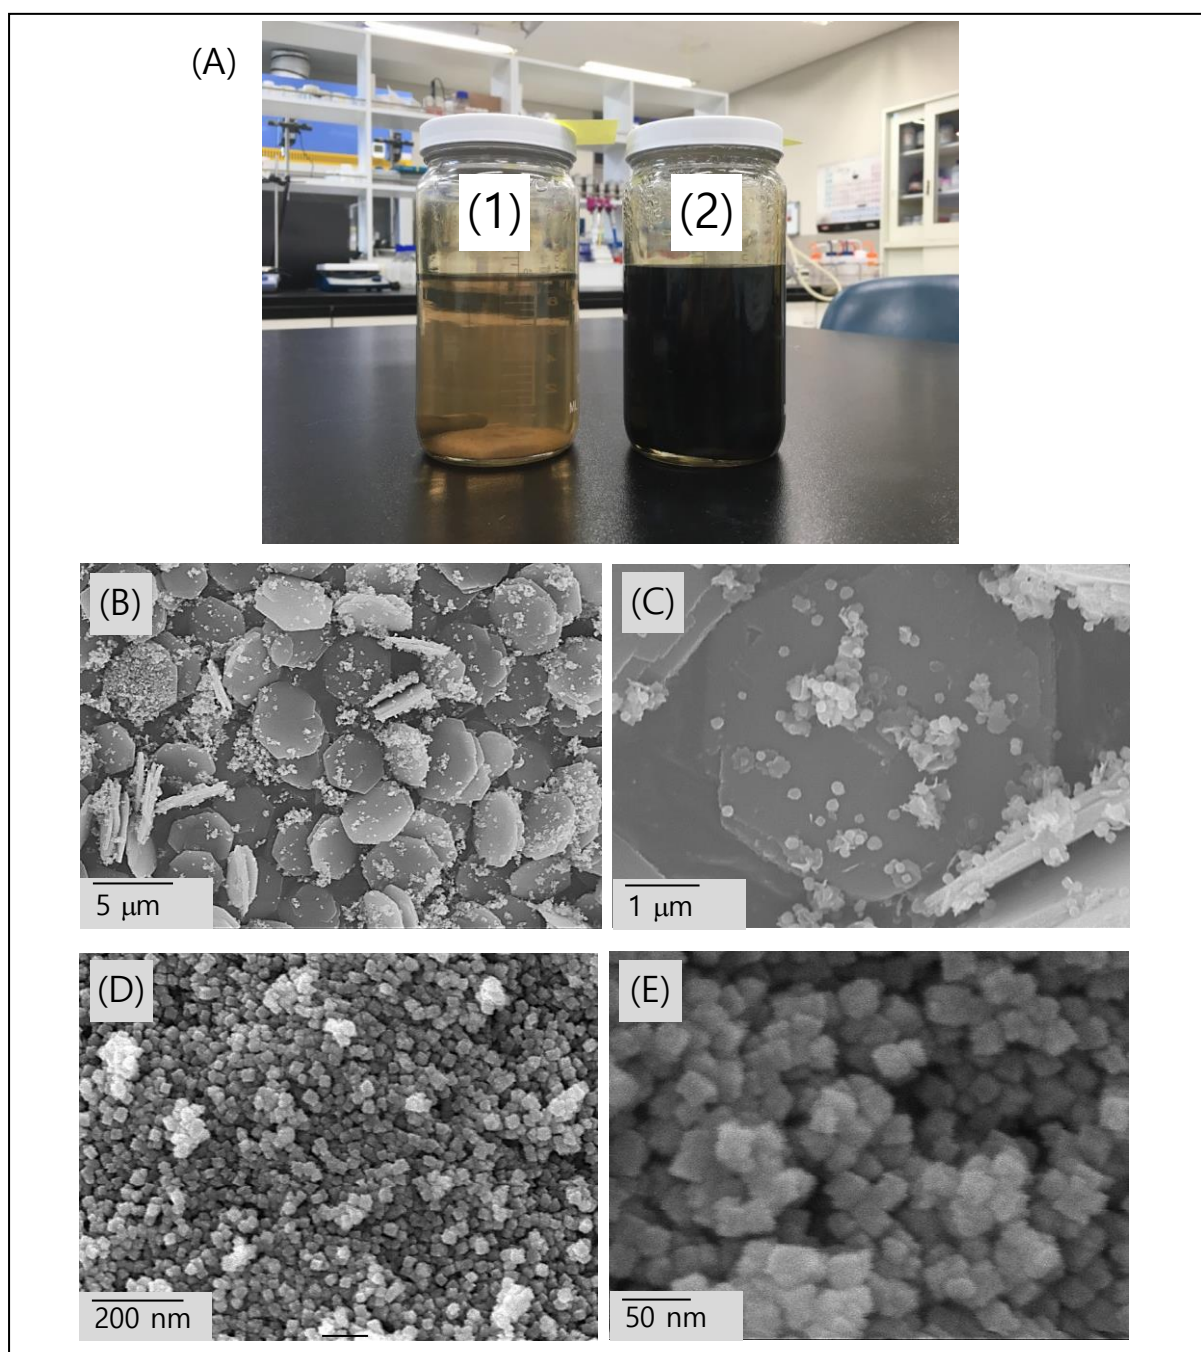

**Figure S1.** Photo of reaction products (A) synthesized at 90 °C in the absence (solution 1) and in the presence (solution 2) of exfoliated  $\text{Co(OH)}_2$  nanosheet. Typical SEM images of solid products corresponding to the solution 1 (B and C) and to solution 2 (D and E). Initial composition of metal cations is  $\text{Mn}=0.005$  and  $\text{Co}=2.995$ .

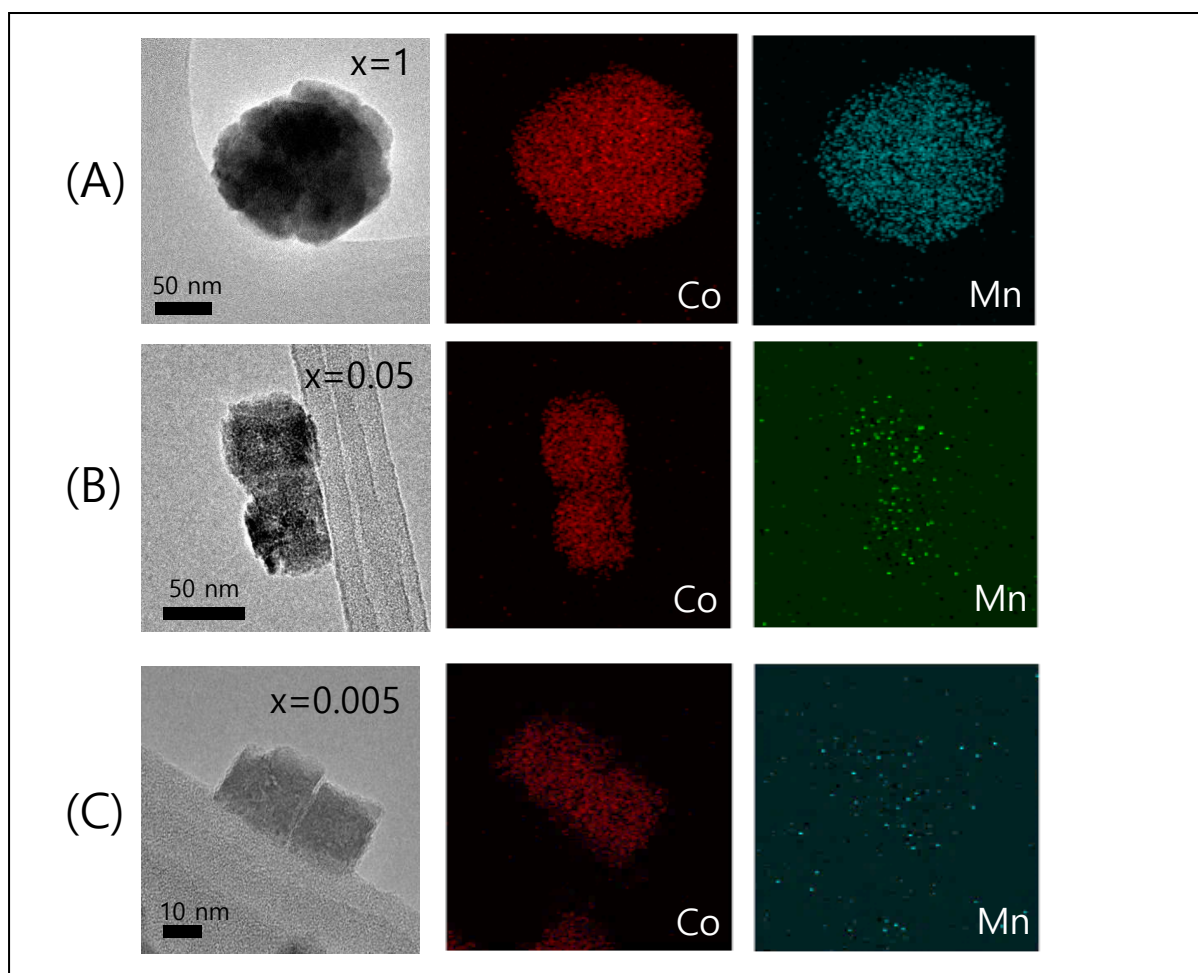

**Figure S2.** Elemental maps of Co and Mn with  $x=1.0$  (A),  $x=0.05$ , and  $x=0.005$ , respectively.

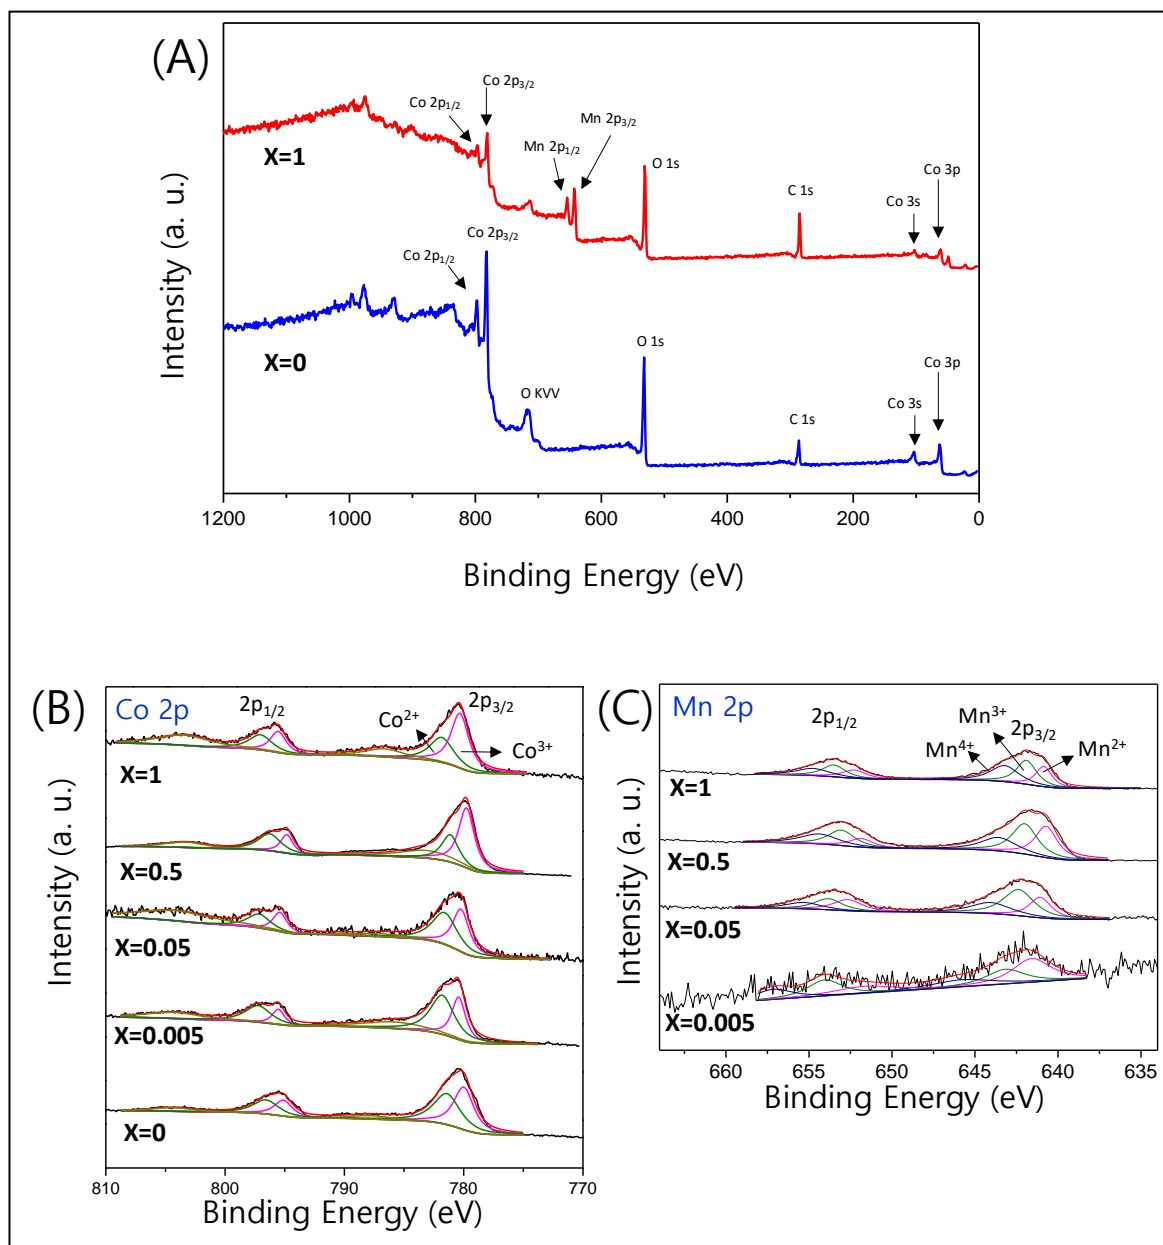

**Figure S3.** Wide XPS spectra (A), and high resolution XPS spectra of Co  $2p$  (B) and Mn  $2p$  (C) for  $\text{Mn}_x\text{Co}_{3-x}\text{O}_4$  nanocubes with various  $x$  values.

**Table S1.** Relative atomic ratio of Mn and Co in  $\text{Mn}_x\text{Co}_{3-x}\text{O}_4$  nanocubes with various x values.

| x ( $\text{Mn}_x\text{Co}_{3-x}\text{O}_4$ nanocube) |                |               |              |
|------------------------------------------------------|----------------|---------------|--------------|
| Expected                                             | ICP-AES (bulk) | XPS (surface) | surface/bulk |
| 1.0                                                  | 0.9            | 1.4           | 1.5          |
| 0.5                                                  | 0.45           | 0.72          | 1.6          |
| 0.05                                                 | 0.06           | 0.15          | 2.5          |
| 0.005                                                | 0.008          | 0.014         | 1.75         |
| 0                                                    | Not detected   | Not detected  | Not detected |

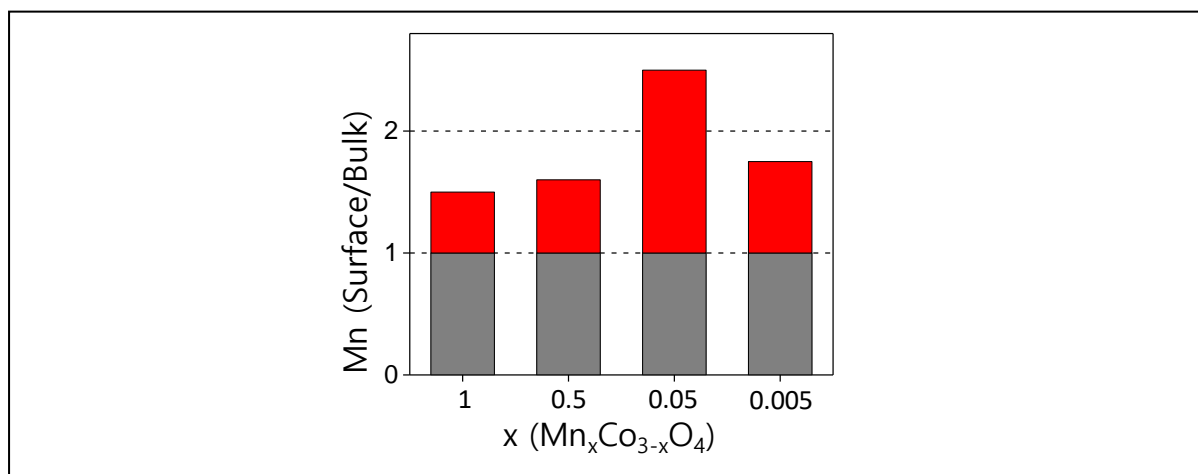

**Figure S4.** Surface to bulk ratios of Mn atom with various x values. The bulk values were measured by ICP-AES and the surface values were obtained by XPS, respectively.

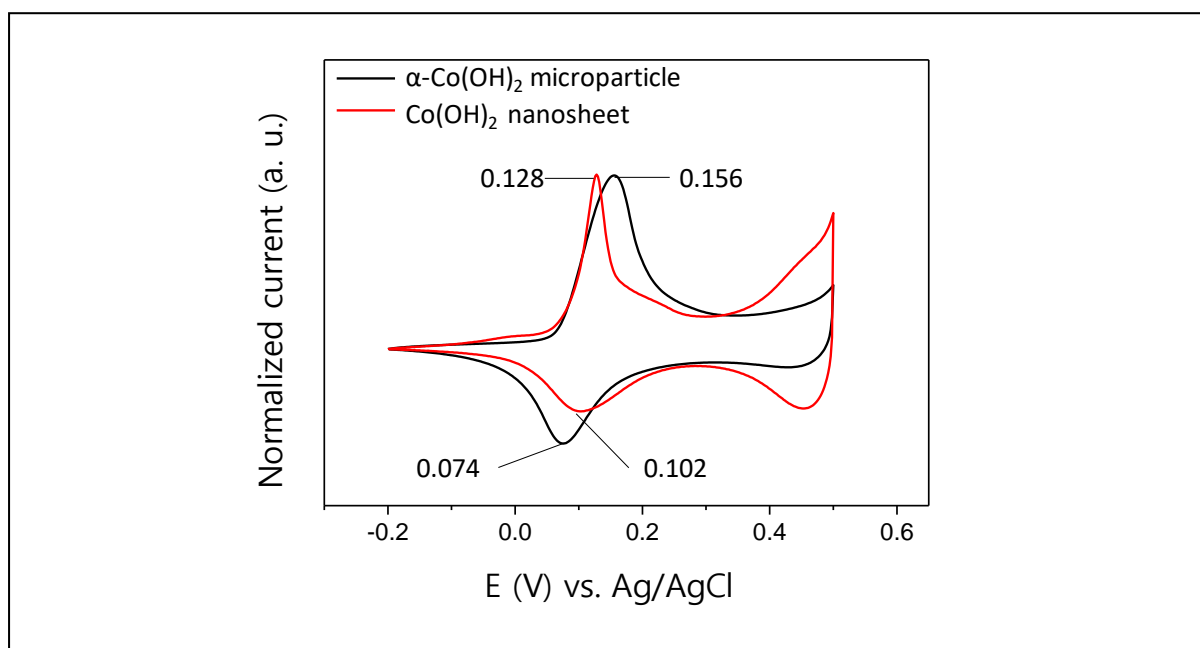

**Figure S5.** CV curves of GC electrodes modified with  $\alpha$ -Co(OH)<sub>2</sub> microparticles (black line) and Co(OH)<sub>2</sub> nanosheet (red line).

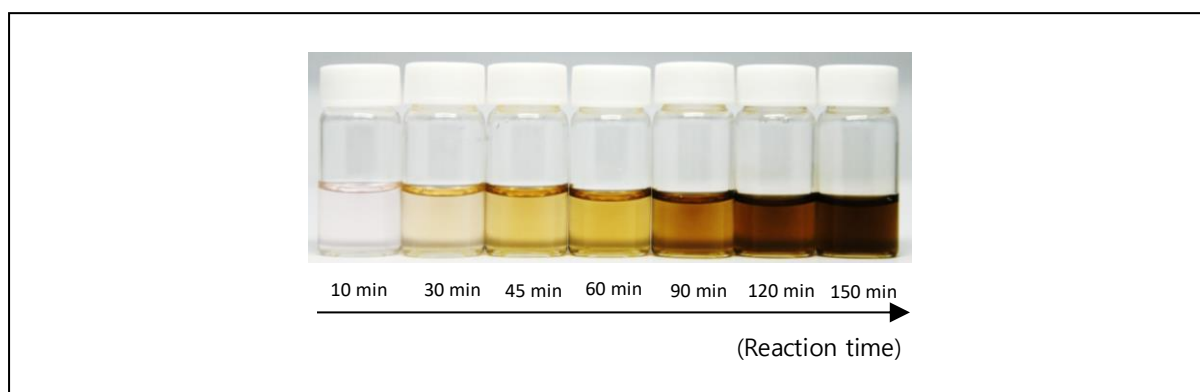

**Figure S6.** Solution color is dramatically changed as a reaction of time function. Asterisk in (A) indicates the peak for Co<sup>2+</sup>(aq).

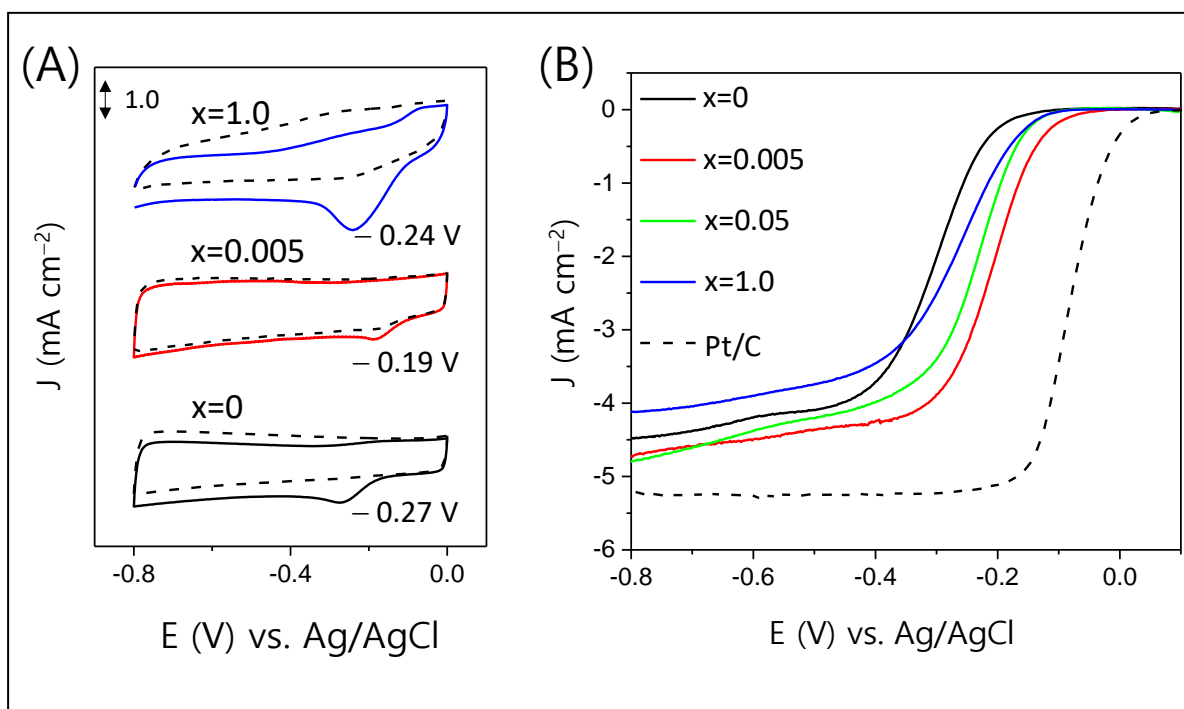

**Figure S7.** CV curves (A) and full ORR polarization curves (B) for GC electrode modified with spinel  $\text{Mn}_x\text{Co}_{3-x}\text{O}_4$  nanocube on carbon black. Scan rate: 50 mVs<sup>-1</sup> (A); 10 mVs<sup>-1</sup> (B). CVs were performed in N<sub>2</sub>-saturated (dashed line) and O<sub>2</sub>-saturated (solid line) KOH (0.1 M) solution. ORR curves were performed in O<sub>2</sub>-saturated KOH (0.1 M) solution at 1600 rpm.

**Table S2.** Summary of ORR activities of  $\text{Mn}_x\text{Co}_{3-x}\text{O}_4$  nanocubes.

| Catalysts                                                            | $E_{\text{onset}}$ (V) | $E_{1/2}$ (V) | Current density<br>( $\text{mA}\cdot\text{cm}^{-2}$ ) at -0.8V | Number of<br>electrons |
|----------------------------------------------------------------------|------------------------|---------------|----------------------------------------------------------------|------------------------|
| $\text{Mn}_x\text{Co}_{3-x}\text{O}_4$<br>( $x=0$ )                  | -0.22                  | -0.30         | 4.55                                                           | 3.6                    |
| $\text{Mn}_x\text{Co}_{3-x}\text{O}_4$<br>( $x=0.005$ )              | -0.12                  | -0.20         | 4.71                                                           | 3.7                    |
| $\text{Mn}_x\text{Co}_{3-x}\text{O}_4$<br>( $x=1$ )                  | -0.16                  | -0.26         | 4.12                                                           | 3.2                    |
| $\text{Mn}_x\text{Co}_{3-x}\text{O}_4$<br>( $x=0$ ) <sup>(1)</sup>   | -                      | -0.25         | -                                                              | ~ 4                    |
| $\text{Mn}_x\text{Co}_{3-x}\text{O}_4$<br>( $x=0.4$ ) <sup>(1)</sup> | -                      | -0.19         | -                                                              | ~ 4                    |
| $\text{c-CoMn}^{(2)}$                                                | -0.075                 | -0.25         | -                                                              | 3.80                   |
| $\text{c-Co}_2\text{Mn}^{(2)}$                                       | -0.11                  | -0.29         | -                                                              | 3.75                   |

1 E. Lee, J.-H. Jang and Y.-U. Kwon, *Journal of power sources*, 2015, **273**, 735-741.

2 C. Li, X. Han, F. Cheng, Y. Hu, C. Chen and J. Chen, *Nature communications*, 2015, **6**, 7345.



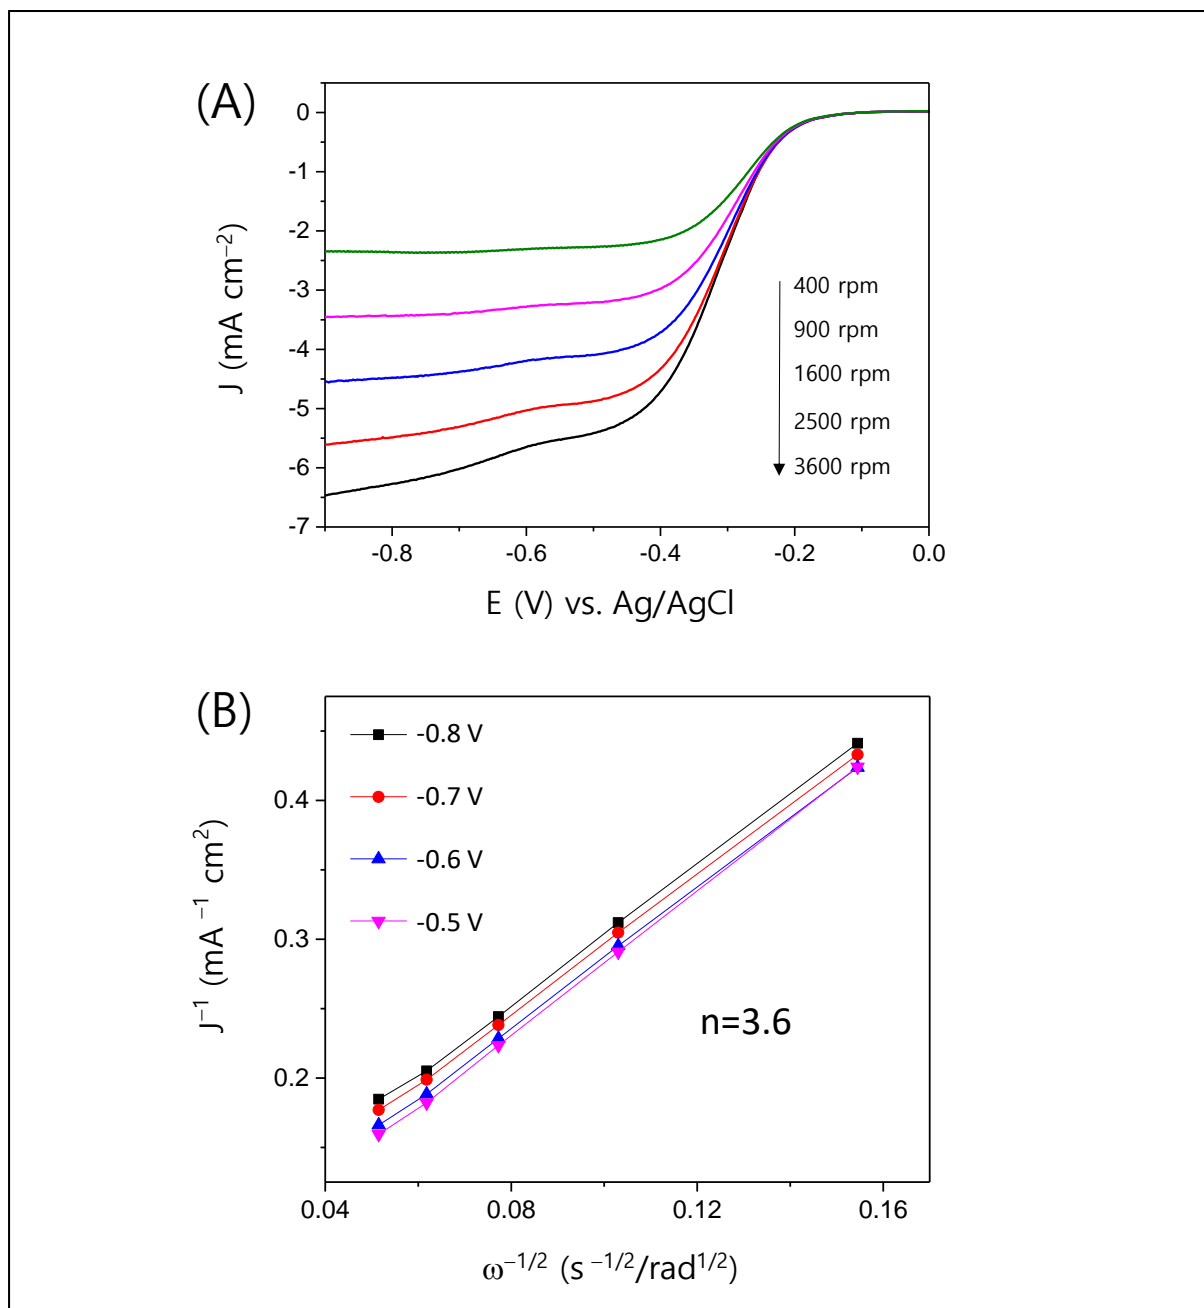

**Figure S8.** ORR polarization curves (A) for GC electrode modified with spinel  $\text{Mn}_x\text{Co}_{3-x}\text{O}_4$  ( $x=0.005$ ) nanocubes on carbon black. K-L plots (B) for the ORR polarization curves. The curves were performed in  $\text{O}_2$ -saturated KOH (0.1 M) solution.

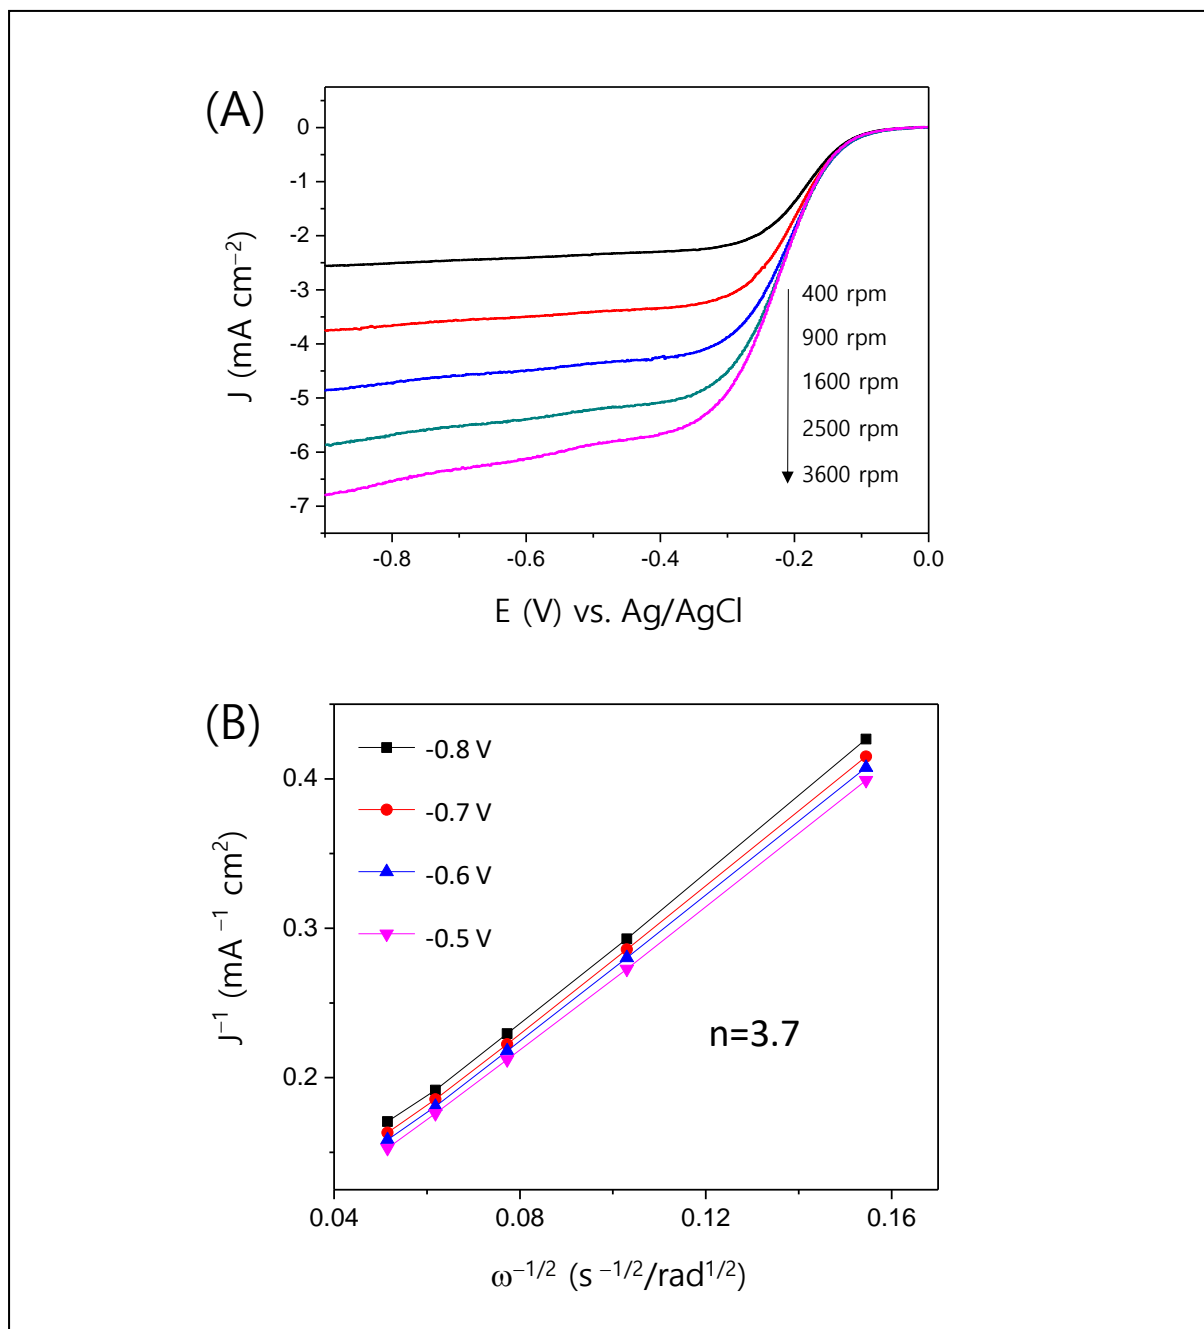

**Figure S9.** ORR polarization curves (A) for GC electrode modified with spinel  $\text{Mn}_x\text{Co}_{3-x}\text{O}_4$  ( $x=0.05$ ) nanocubes on carbon black. K-L plots (B) for the ORR polarization curves. The curves were performed in  $\text{O}_2$ -saturated  $\text{KOH}$  (0.1 M) solution.

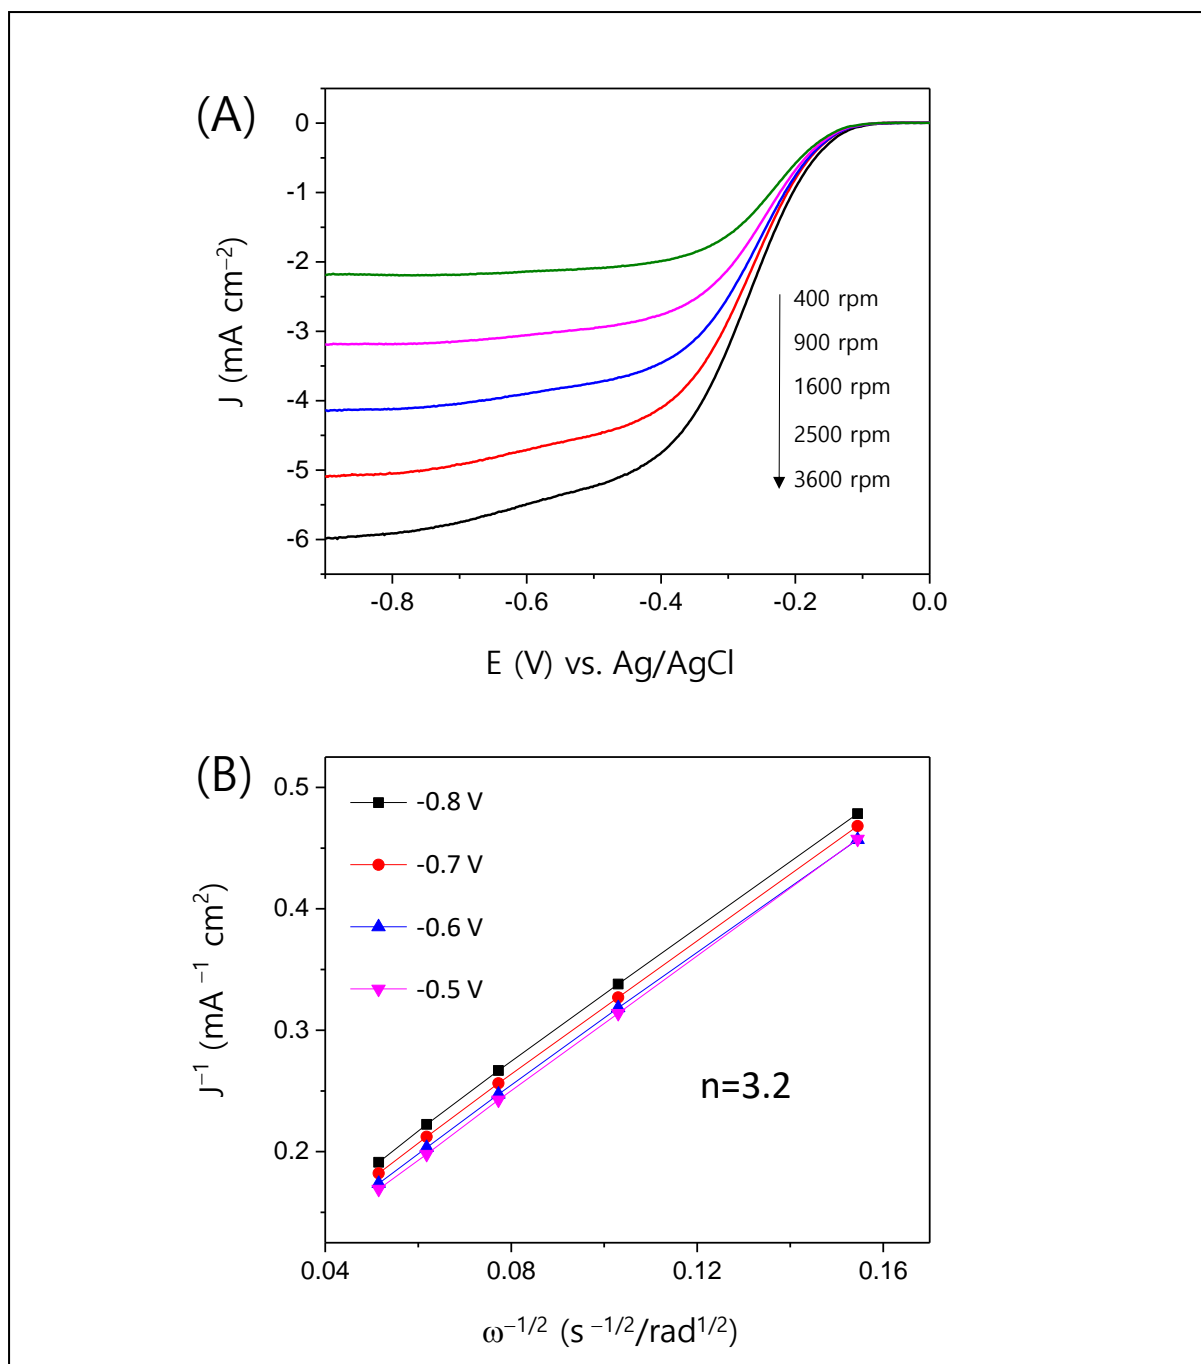

**Figure S10.** ORR polarization curves (A) for GC electrode modified with spinel  $\text{Mn}_x\text{Co}_{3-x}\text{O}_4$  ( $x=1.0$ ) nanocubes on carbon black. K-L plots (B) for the ORR polarization curves. The curves were performed in  $\text{O}_2$ -saturated  $\text{KOH}$  (0.1 M) solution.

**Table S3.** Summary of XPS atomic ratio of spinel  $\text{Mn}_x\text{Co}_{3-x}\text{O}_4$  nanotubes.

| Catalysts                                               | Atomic ratio (XPS)       |                                 |                                 |
|---------------------------------------------------------|--------------------------|---------------------------------|---------------------------------|
|                                                         | $\text{Mn}(x)/\text{Co}$ | $\text{Mn}^{3+}/\text{Mn}^{2+}$ | $\text{Co}^{3+}/\text{Co}^{2+}$ |
| $\text{Mn}_x\text{Co}_{3-x}\text{O}_4$<br>( $x=0$ )     | -                        | -                               | 1.0                             |
| $\text{Mn}_x\text{Co}_{3-x}\text{O}_4$<br>( $x=0.005$ ) | 0.014/2.986              | 1.0                             | 0.7                             |
| $\text{Mn}_x\text{Co}_{3-x}\text{O}_4$<br>( $x=1$ )     | 1.4/1.6                  | 1.1                             | 1.4                             |

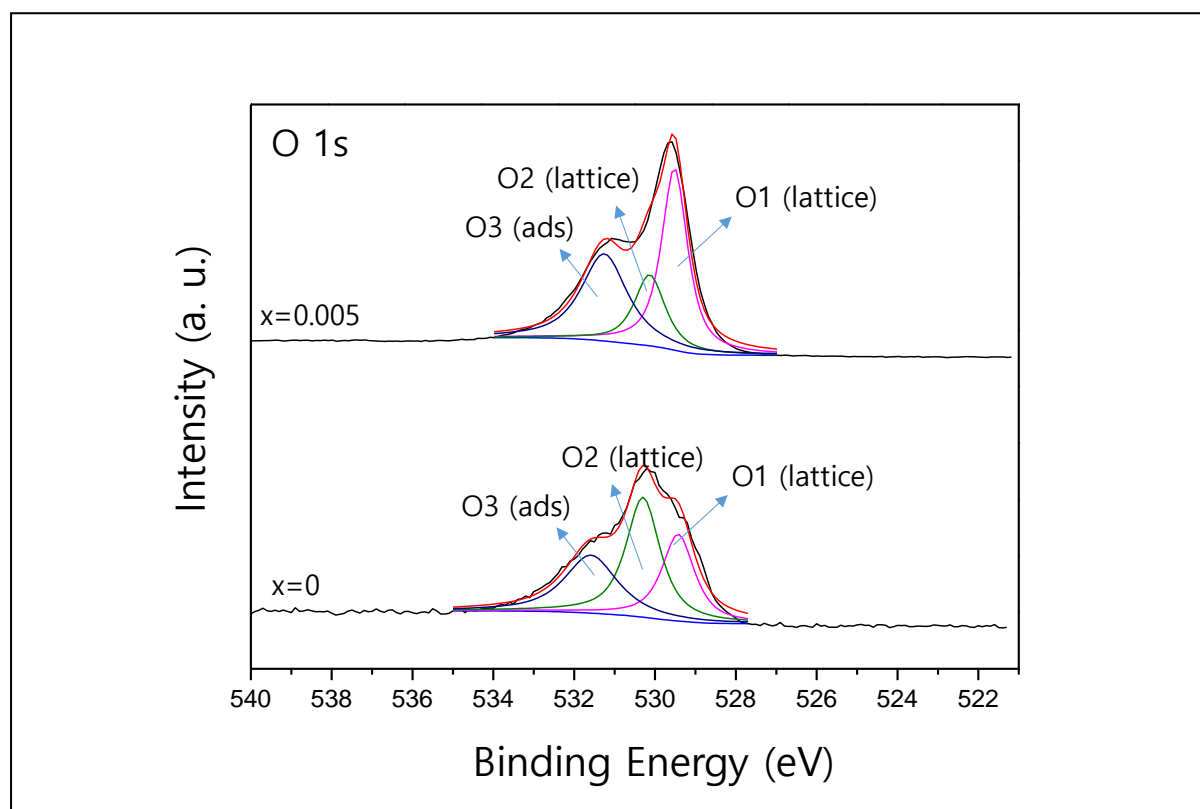

**Figure S11.** High resolution XPS spectra for O 1s of spinel  $\text{Mn}_x\text{Co}_{3-x}\text{O}_4$  nanocubes ( $x=0$  and  $x=0.005$ ). The O1 and O2 correspond to lattice oxygen, and the O3 corresponds to surface adsorbed oxygen-containing species[ref], respectively.
